# Supplementary material for: Phosphorylation of β-arrestin2 at Thr383 by MEK underlies β-arrestin-dependent activation of Erk1/2 by GPCRs
Source: eLife. 2017 Feb 7;6:e23777. doi: 10.7554/eLife.23777 (PMC5325621; doi:10.7554/eLife.23777)
Supplement: Figure 1—source data 1. — Quantitative data were used to build histogram in Figure 1B. Phosphorylated peptides were analyzed by nano-LC-MS/MS using multistage activation on the neutral loss of phosphoric acid. For each peptide, the position of modified residue(s) in the protein sequence, experimental and theoretical masses, mass deviation, charge, Mascot score and corresponding p-value are indicated. The phosphorylation index (phosphorylated peptide MS signal intensity/phosphorylated peptide MS signal intensity + non-phosphorylated peptide MS signal intensity) in cells expressing or not 5-HT2C or 5-HT4 receptor and treated with vehicle or 5-HT was also calculated for each phosphorylated peptide identified. ND: not detected. Results of one-way ANOVA for the EIDIPVDTNLIEFDTNYApTDDDIVFEDFAR peptide: F(5,12) = 7.544, p=0.020. *p<0.05 vs. vehicle. DOI: http://dx.doi.org/10.7554/eLife.23777.003 [file elife-23777-fig1-data1.xlsx]

## Sheet: Feuil1
Gene Name	Exp m/z	Experimental mass	z	Calculated mass	Mass deviation	Score	P value	Modified sequence	Mock	5-HT2C			5-HT4
									Vehicle	Vehicle	5-HT 5 min	5-HT 30 min	Vehicle	5-HT 5 min	5-HT 30 min
Arrb1	1173.188	3516.5421	3	3516.5345	2.16	35	0.0018	EVPESETPVDpT374NLIELDTNDDDIVFEDFAR	ND	ND	ND	ND	0.005 ± 0.002	0.007 ± 0.001	0.006 ± 0.000
Arrb2	1188.5015	2374.9884	2	2374.9811	3.07	92	7.1E-9	CPVAQLEQDDQVSPp(S267S268)TFCK	0.028 ± 0.026	0.023 ± 0.025	0.031 ± 0.024	0.024 ± 0.021	0.013 ± 0.010	0.004 ± 0.004	0.005 ± 0.005
Arrb2	1195.8674	3584.5805	3	3584.576	1.26	33	0.0019	EIDIPVDTNLIEFDTNYApT383DDDIVFEDFAR	0.082 ± 0.090	0.072 ± 0.049	0.194 ± 0.044*	0.198 ± 0.037*	0.015 ± 0.006	0.022 ± 0.002	0.031 ± 0.008
Arrb2	571.2523	1140.49	2	1140.4899	0.018	46	0.00093	HFLMpS194DRR	0.112 ± 0.082	0.072 ± 0.028	0.195 ± 0.137	0.226 ± 0.170	0.082 ± 0.022	0.062 ± 0.010	0.077 ± 0.003
Arrb2	1061.5044	2120.9942	2	2119.9939	471.8	53	0.00006	KVQFAPEpT178PGPQPSAETTR	0.722 ± 0.219	0.695 ± 0.169	0.821 ± 0.097	0.923 ± 0.030	0.942 ± 0.039	0.950 ± 0.039	0.916 ± 0.038
Arrb2	707.6733	2119.998	3	2119.9939	1.93	36	0.0013
Arrb2	601.298	1800.8721	3	1800.8784	-3.50	36	0.00071	PHDHITLPRPQpS361APR	0.212 ± 0.077	0.407 ± 0.121	0.362 ± 0.077	0.335 ± 0.029	0.552 ± 0.098	0.423 ± 0.033	0.546 ± 0.045
Arrb2	451.2268	1800.878	4	1800.8784	-0.22	35	0.0016
Arrb2	901.9506	1801.8866	2	1800.8784	560.0	74	1.1E-6
Arrb2	996.9587	1991.9029	2	1991.899	1.98	86	3.7E-8	VQFAPEpT178PGPQPSAETTR	0.212 ± 0.052	0.186 ± 0.088	0.212 ± 0.077	0.184 ± 0.103	0.289 ± 0.030	0.285 ± 0.071	0.288 ± 0.052
Arrb2	736.3648	1470.7151	2	1470.7119	2.18	49	8.7E-5	VYTITPLLpS281DNR	0.009 ± 0.004	0.007 ± 0.003	0.006 ± 0.001	0.005 ± 0.002	0.005 ± 0.003	0.004 ± 0.003	0.006 ± 0.004
Arrb2	864.9322	1727.8498	2	1727.8495	0.2	58	3.4E-5	VYTITPLLpS281DNREK
