# Supplementary material for: Phosphorylation of β-arrestin2 at Thr383 by MEK underlies β-arrestin-dependent activation of Erk1/2 by GPCRs
Source: eLife. 2017 Feb 7;6:e23777. doi: 10.7554/eLife.23777 (PMC5325621; doi:10.7554/eLife.23777)
Supplement: Figure 1—source data 2. — DOI: http://dx.doi.org/10.7554/eLife.23777.004 [file elife-23777-fig1-data2.xlsx]

## Sheet: Feuil1
		Thr383 phosphorylation (a.u.)
		Mean	SEM
Mock	Vehicle	1	0.02
5-HT2C receptor	Vehicle	1.7	0.2
	5-HT	3.85	1.05
5-HT4 receptor	Vehicle	1.61	0.32
	5-HT	1.81	0.29
