# Supplementary material for: Phosphorylation of β-arrestin2 at Thr383 by MEK underlies β-arrestin-dependent activation of Erk1/2 by GPCRs
Source: eLife. 2017 Feb 7;6:e23777. doi: 10.7554/eLife.23777 (PMC5325621; doi:10.7554/eLife.23777)
Supplement: Figure 2—figure supplement 1—source data 1. — DOI: http://dx.doi.org/10.7554/eLife.23777.013 [file elife-23777-fig2-figsupp1-data1.xlsx]

## Sheet: Feuil1
	Thr383 phosphorylation (Normalized to 5-HT response)
	Mean	SEM
Vehicle	0.42	0.11
5-HT	1	0.16
TBCA	0.5	0.15
5-HT+TBCA	0.93	0.04
