# Supplementary material for: Phosphorylation of β-arrestin2 at Thr383 by MEK underlies β-arrestin-dependent activation of Erk1/2 by GPCRs
Source: eLife. 2017 Feb 7;6:e23777. doi: 10.7554/eLife.23777 (PMC5325621; doi:10.7554/eLife.23777)
Supplement: Figure 2—figure supplement 3—source data 1. — DOI: http://dx.doi.org/10.7554/eLife.23777.016 [file elife-23777-fig2-figsupp3-data1.xlsx]

## Sheet: Feuil1
	32P (nmol/min/mg)
	mean	SD
WT b-arr2	0.223394	0.027895
T383A b-arr2	0.0426606	0.0253002
Erk2	0.218349	0.00259489
