# Supplementary material for: Phosphorylation of β-arrestin2 at Thr383 by MEK underlies β-arrestin-dependent activation of Erk1/2 by GPCRs
Source: eLife. 2017 Feb 7;6:e23777. doi: 10.7554/eLife.23777 (PMC5325621; doi:10.7554/eLife.23777)
Supplement: Figure 2—source data 1. — DOI: http://dx.doi.org/10.7554/eLife.23777.011 [file elife-23777-fig2-data1.xlsx]

## Sheet: Feuil1
Figure 2B
			Phosphorylation index		Normalized to 5-HT response (%)
			mean	SEM	mean	SEM
b-arr2	Control	Vehicle	21.7993	6.16575	49.7049	14.0586
b-arr2 + 5-HT2C receptor	Control	Vehicle	17.3734	4.38662	39.6135	10.002
		5-HT	43.8574	2.12232	100	4.83913
	FR180204	Vehicle	14.7696	4.43203	33.6764	10.1055
		5-HT	49.5898	1.99833	113.07	4.55643
	U0126	Vehicle	17.5827	1.53114	40.0906	3.49118
		5-HT	19.2942	1.27722	43.993	2.9122
	MEK1DN	Vehicle	18.2	0.743382	41.4981	1.695
		5-HT	23	1.09602	52.4427	2.49904
Figure 2C
	pT383b-arr2/b-arr2
	mean	SEM
b-arr2	0.07	0.0037
b-arr2+MEK1	1	0.049
b-arr2+MEK1+U0126	0.063	0.0076
T383Ab-arr2	N.D.	N.D.
T383Ab-arr2+MEK1	N.D.	N.D.
