# Supplementary material for: Phosphorylation of β-arrestin2 at Thr383 by MEK underlies β-arrestin-dependent activation of Erk1/2 by GPCRs
Source: eLife. 2017 Feb 7;6:e23777. doi: 10.7554/eLife.23777 (PMC5325621; doi:10.7554/eLife.23777)
Supplement: Figure 3—source data 1. — DOI: http://dx.doi.org/10.7554/eLife.23777.018 [file elife-23777-fig3-data1.xlsx]

## Sheet: Feuil1
Figure 3A						Figure 3B
	WT RLucBArr2	T383A RLucBArr2	T383D RLucBArr2				WT RLucBArr2	T383A RLucBArr2	T383D RLucBArr2
Basal (mean)	100	100	100			Basal (mean)	100	100	100
Basal (SEM)	47.8365	53.744	13.2791			Basal (SEM)	20.7623	35	50.9423
5-HT (mean)	337.325	396.516	314.617			5-HT (mean)	1033.45	1046.45	1420.33
5-HT (SEM)	52.0138	41.1959	33.236			5-HT (SEM)	33.7713	30.5408	20
Figure 3C						Figure 3D
	Mock	WT BArr2	T383A BArr2	T383D BArr2			Mock	WT BArr2	T383A BArr2	T383D BArr2
Basal (mean)	34.45	100	83.7	114.62		Basal (mean)	0.74	100	109.2	85.38
Basal (SEM)	7.75	9.89	13.69	16.23		Basal (SEM)	0.12	5.05	11.9	6.04
5-HT (mean)	_	39.79	36.81	41.07		5-HT (mean)	_	33.91	38.24	32.43
5-HT (SEM)	_	8.18	6.62	5.99		5-HT (SEM)	_	3.67	2.39	4.29
Figure 3E						Figure 3F
	WT BArr2	T383A BArr2	T383D BArr2				WT BArr2	T383A BArr2	T383D BArr2
Basal (mean)	100	18.3378	286.73			Basal (mean)	100	124.96	115.3
Basal (SEM)	0	82.66	46.73			Basal (SEM)	0	7.71	3.75
5-HT (mean)	390.339	124.032	283.086			5-HT (mean)	189.14	199.11	162.36
5-HT (SEM)	86.34	37.97	84.09			5-HT (SEM)	24.75	22.61	19.18
