# Supplementary material for: Phosphorylation of β-arrestin2 at Thr383 by MEK underlies β-arrestin-dependent activation of Erk1/2 by GPCRs
Source: eLife. 2017 Feb 7;6:e23777. doi: 10.7554/eLife.23777 (PMC5325621; doi:10.7554/eLife.23777)
Supplement: Figure 4—figure supplement 1—source data 1. — DOI: http://dx.doi.org/10.7554/eLife.23777.022 [file elife-23777-fig4-figsupp1-data1.xlsx]

## Sheet: Feuil1
		Co-immunoprecipitated Erk
		mean	SEM
Empty vector	Vehicle	15.2	4.31
b-arr2	Vehicle	19.7	8.67
	5-HT	100	5.9
	U0126	29.5	17.8
	5-HT + U0126	34.3	6.6
