# Supplementary material for: Phosphorylation of β-arrestin2 at Thr383 by MEK underlies β-arrestin-dependent activation of Erk1/2 by GPCRs
Source: eLife. 2017 Feb 7;6:e23777. doi: 10.7554/eLife.23777 (PMC5325621; doi:10.7554/eLife.23777)
Supplement: Figure 4—source data 1. — DOI: http://dx.doi.org/10.7554/eLife.23777.020 [file elife-23777-fig4-data1.xlsx]

## Sheet: Feuil1
Figure 4A								Figure 4B
	Basal (Mean)	5-HT (Mean)	Basal (SEM)	5-HT (SEM)					Basal (Mean)	5-HT (Mean)	Basal (SEM)	5-HT (SEM)
Mock	_	_	_	_				Mock	_	_	_	_
WT BArr2	100	285.11	0	30.6				WT BArr2	100	66.49	0	9.41
T383A Barr2	173.33	169	16.18	25.74				T383A Barr2	125.21	86.56	36.74	51.94
T383D Barr2	316.66	306.67	66.81	69.62				T383D Barr2	182.71	164.25	26.17	88.44
Figure 4C								Figure 4D
	Basal (Mean)	5-HT 5min (Mean)	5-HT 30min (Mean)	Basal (SEM)	5-HT 5 min (SEM)	5-HT 30 min (SEM)			Basal (Mean)	5-HT 5min (Mean)	5-HT 30min (Mean)	Basal (SEM)	5-HT 5 min (SEM)	5-HT 30 min (SEM)
WT BArr2	29.63	100	80.68	3.51	5.17	11		WT BArr2	50.41	100	82.58	6.92	9.35	13.5
T383A Barr2	20.58	66.64	36.08	0.22	4.64	1.61		T383A Barr2	40.56	85.62	87.18	0.4	18.47	12.53
T383D Barr2	64.51	75.2	55.28	9.53	4.7	14.87		T383D Barr2	76.07	126.93	89.43	6.53	15.81	20.62
