# Supplementary material for: Phosphorylation of β-arrestin2 at Thr383 by MEK underlies β-arrestin-dependent activation of Erk1/2 by GPCRs
Source: eLife. 2017 Feb 7;6:e23777. doi: 10.7554/eLife.23777 (PMC5325621; doi:10.7554/eLife.23777)
Supplement: Figure 5—figure supplement 1—source data 1. — DOI: http://dx.doi.org/10.7554/eLife.23777.026 [file elife-23777-fig5-figsupp1-data1.xlsx]

## Sheet: Feuil1
Figure 5 - Figure Supplement 1A						Figure 5 - Figure Supplement 1B
	Mean	SEM					Mean	SEM
Cont siRNA	100	13.16				Cont siRNA	100	7.22
BArr2 siRNA	30.76	4.97				BArr2 siRNA	38.23	3.91
