# Supplementary material for: Phosphorylation of β-arrestin2 at Thr383 by MEK underlies β-arrestin-dependent activation of Erk1/2 by GPCRs
Source: eLife. 2017 Feb 7;6:e23777. doi: 10.7554/eLife.23777 (PMC5325621; doi:10.7554/eLife.23777)
Supplement: Figure 5—source data 1. — DOI: http://dx.doi.org/10.7554/eLife.23777.024 [file elife-23777-fig5-data1.xlsx]

## Sheet: Feuil1
Figure 5A						Figure 5B						Figure 5C
Time (min)	Cont siRNA (mean)	Cont siRNA (SEM)	B-Arr2 siRNA (mean)	B-Arr2 siRNA (SEM)		Time (min)	Cont siRNA (mean)	Cont siRNA (SEM)	B-Arr2 siRNA (mean)	B-Arr2 siRNA (SEM)		Time (min)	Cont siRNA (mean)	Cont siRNA (SEM)	B-Arr2 siRNA (mean)	B-Arr2 siRNA (SEM)
0	33.9333	16.0497	26.9667	7.55456		0	11.4	3.37931	4.13333	2.53246		0	31.3	9.48546	18.8	5.2942
5	100	9.66	93.8	15.9226		5	100	11.79	51.9333	9.15442		5	100	12.05	71.6333	6.42364
30	88.8	10.7107	44.3667	4.97163		30	47.0667	14.9023	6.03333	5.62257		30	61.2667	1.46713	20.2333	2.83307
Figure 5D						Figure 5E						Figure 5F
Time (min)	WT (mean)	WT (SEM)	T383A (mean)	T383A (SEM)		Time (min)	WT (mean)	WT (SEM)	T383A (mean)	T383A (SEM)		Time (min)	WT (mean)	WT (SEM)	T383A (mean)	T383A (SEM)
0	28.97	12.49	24.8667	8.37211		0	12.8333	3.57105	15.8667	1.283		0	31.8	9.93687	22.1	9.08104
5	100	12	81.3	23.377		5	100	11.91	57.3667	6.51903		5	100	12.03	60.2667	12.7978
30	96.37	12.1	48.1333	9.30901		30	59.6333	3.81028	37.2	1.86618		30	83.35	2.30792	38.5	12.6284
