# Supplementary figures and images for: Phosphorylation of β-arrestin2 at Thr383 by MEK underlies β-arrestin-dependent activation of Erk1/2 by GPCRs
Source: eLife journal article supplement (doi:10.7554/elife.23777), 2017-02-07

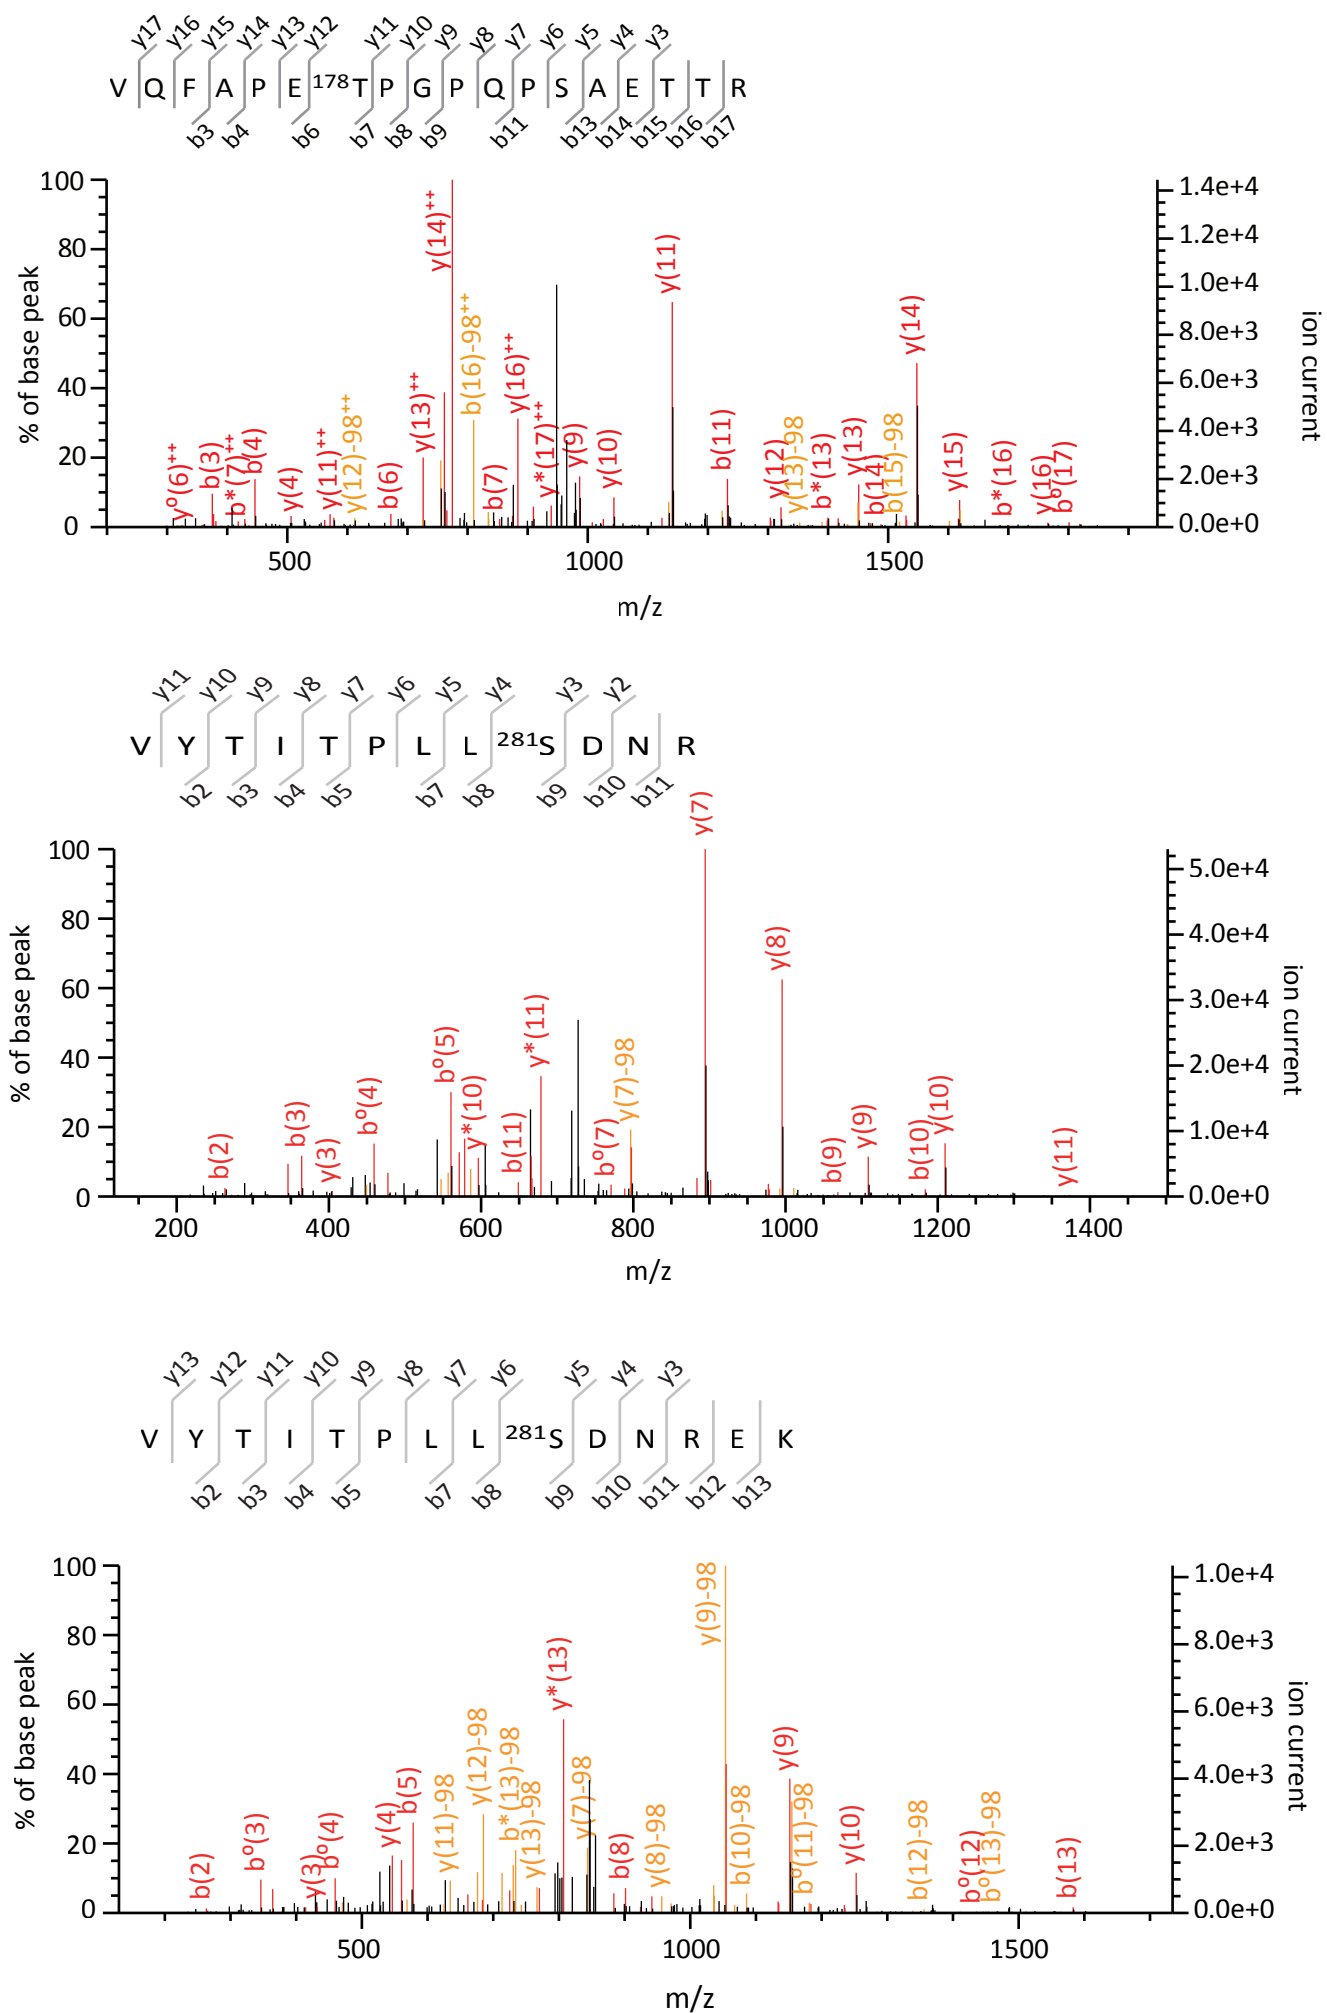

Figure 1 - Figure supplement 5

Supplement: supp [file elife-23777-supp-v1.zip]

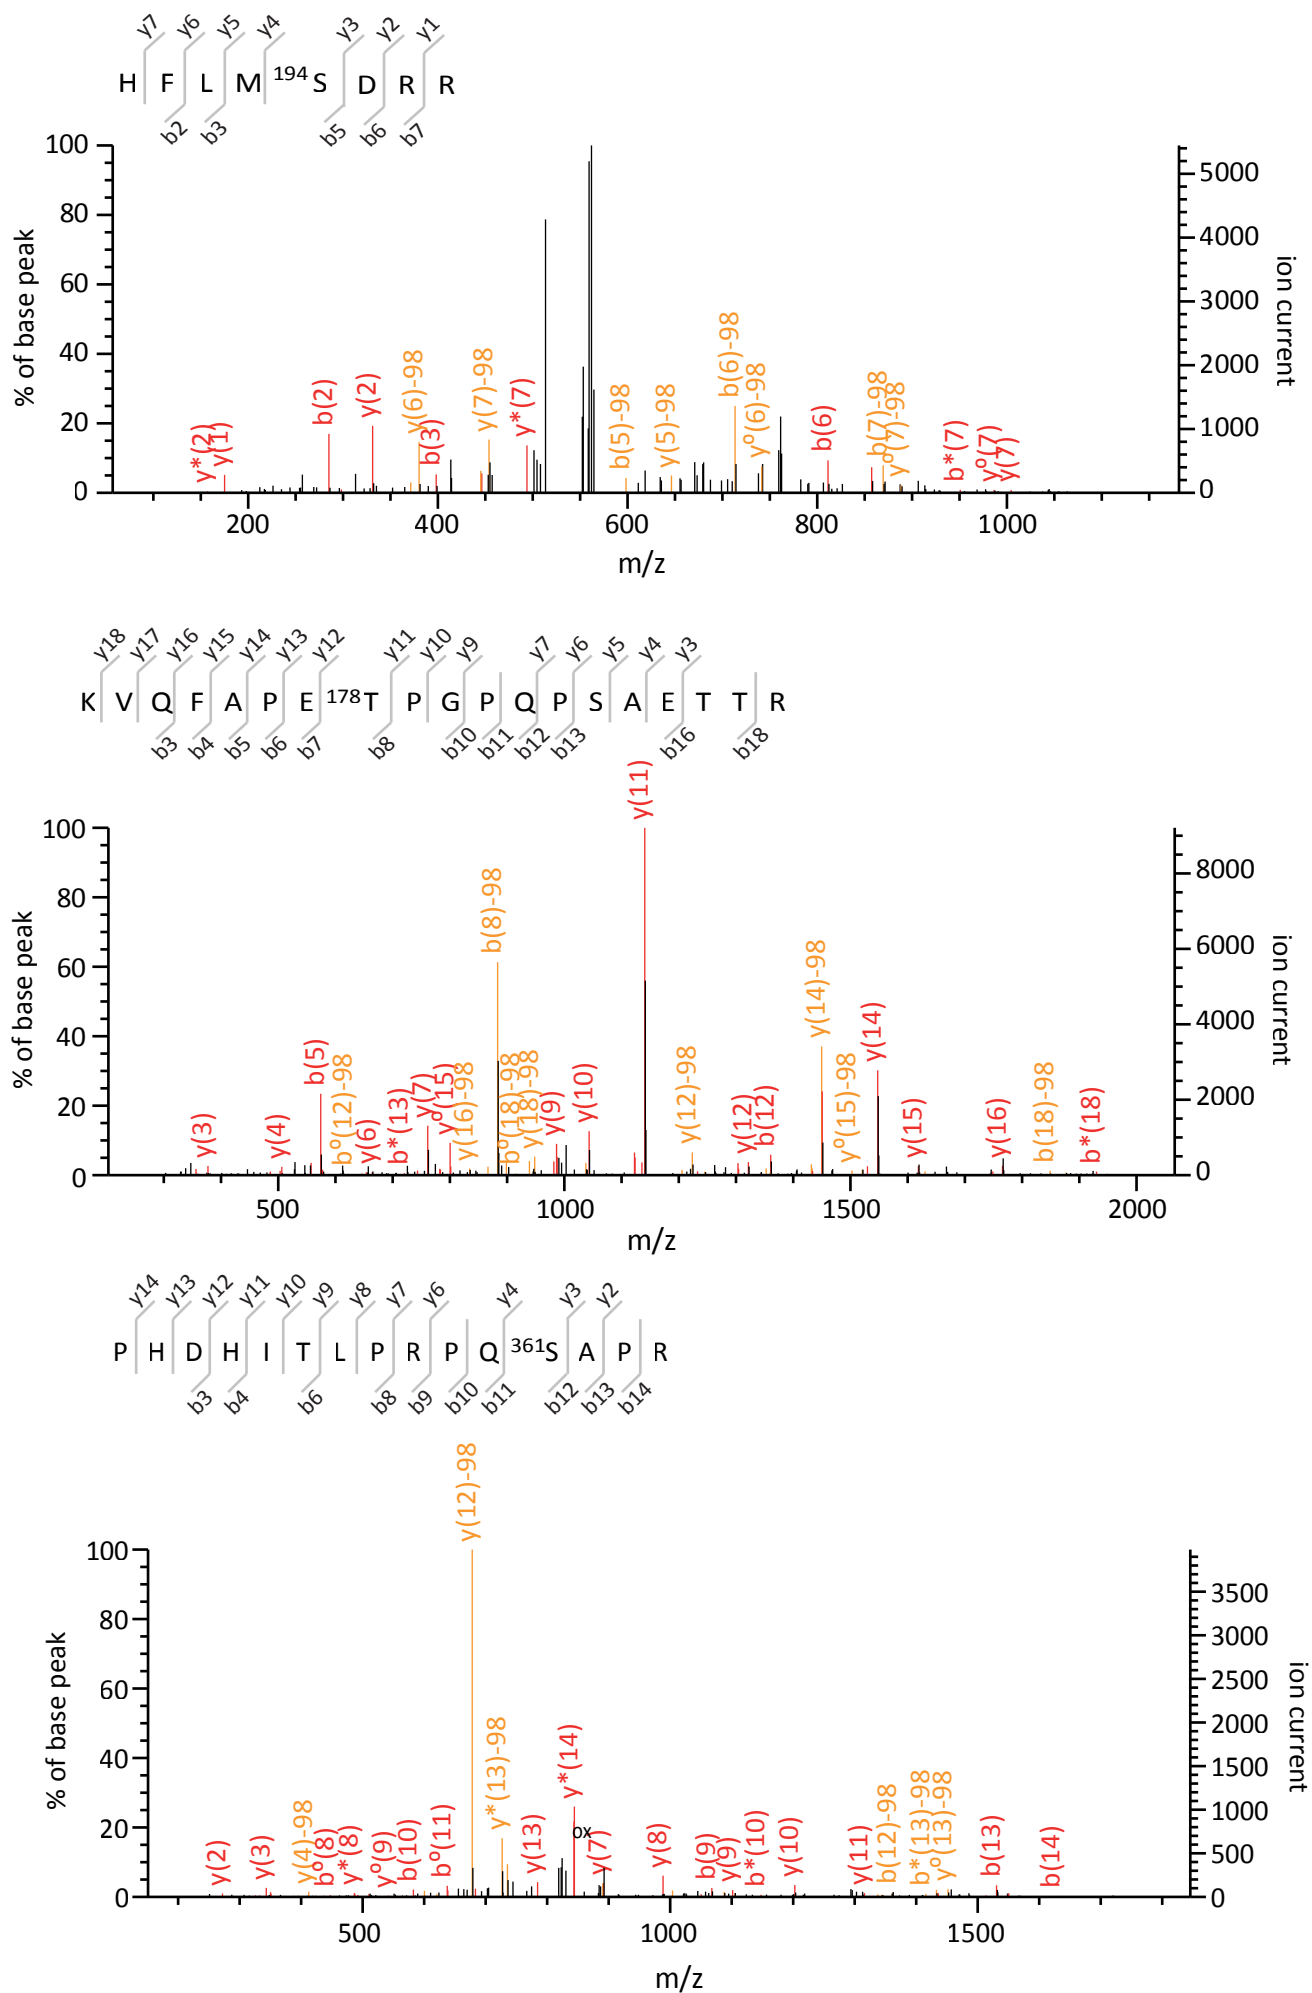

Figure 1- Figure supplement 4

Supplement: supp [file elife-23777-supp-v1.zip]

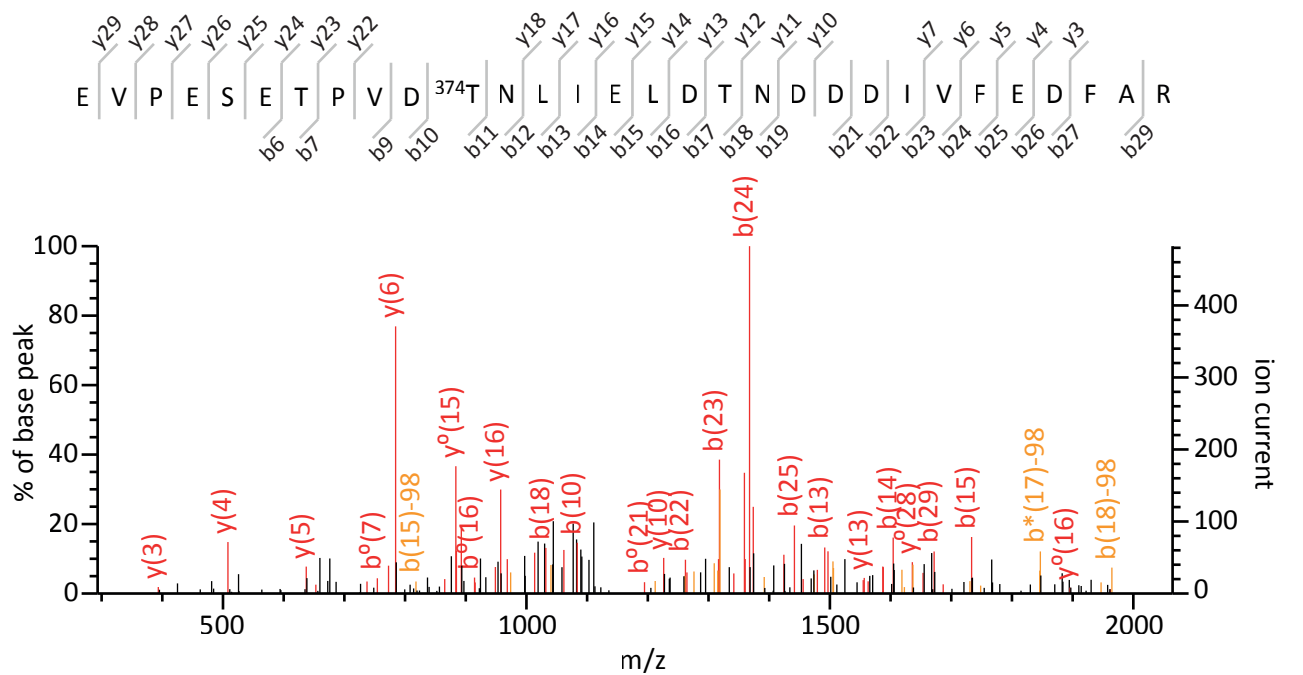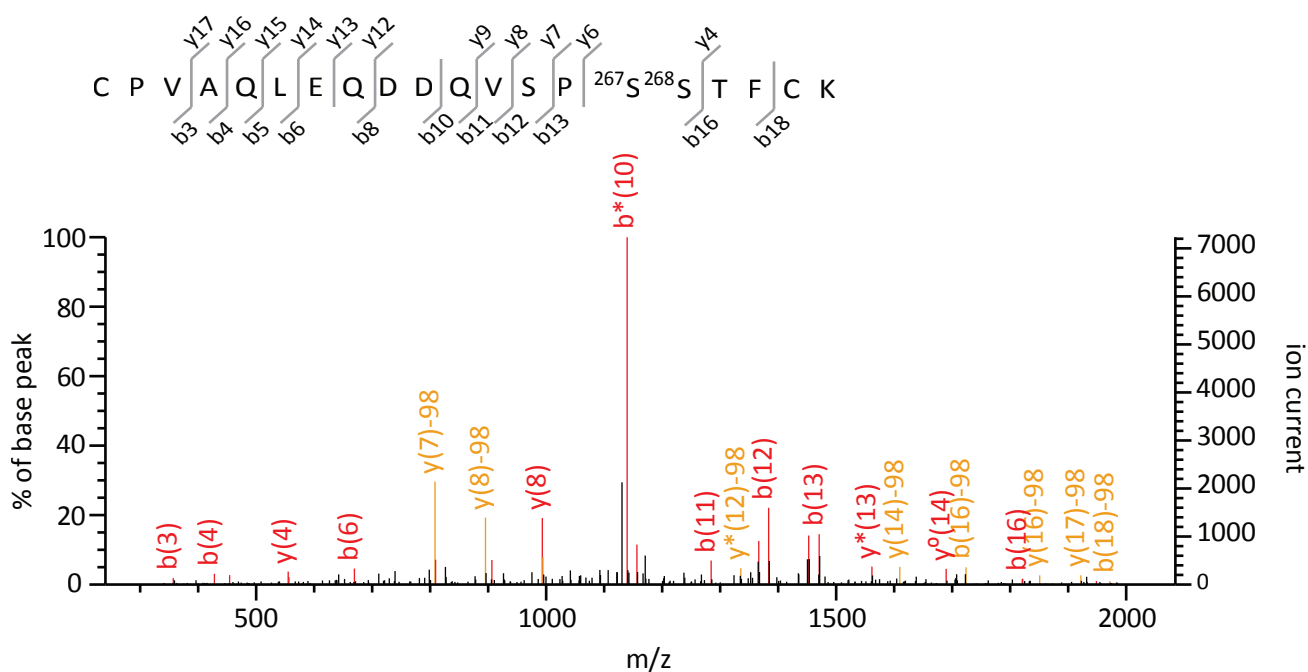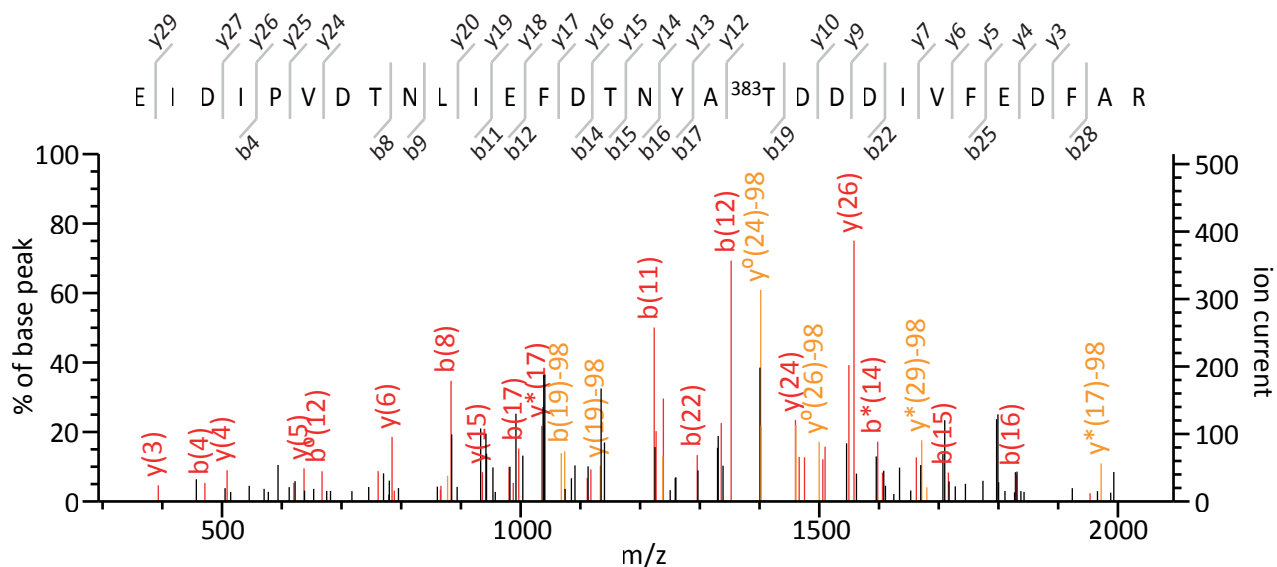

Figure 1 - Figure supplement 3

Supplement: supp [file elife-23777-supp-v1.zip]
